# Supplementary material for: Confinement of folding motifs within central blocks improves single chain polymer nanoparticle folding
Source: Royal Society of Chemistry journal article supplement (doi:10.1039/d3py01166f), 2023-12-19
Supplement: d3py01166f1.pdf [file d3py01166f1.pdf]

# Confinement of folding motifs within central blocks improves single chain polymer nanoparticle folding

Shegufta Farazi, Martina Stenzel, Robert Chapman

## Supporting Information

### 1. SYNTHETIC SCHEMES

#### Peptide copolymer synthesis

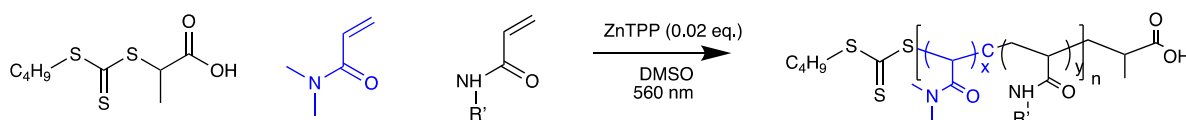

#### Peptide monomers

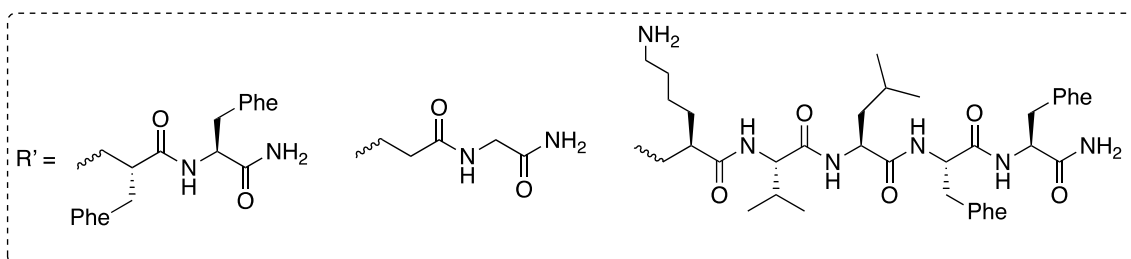

**Scheme S1.** General PET-RAFT polymerisation of statistical copolymers of DMA, FF, GG<sup>N</sup> and GG<sup>O</sup> monomers. Mol.% of peptides was varied from 5-15% (y) and of DMA, 85-95% (x) relative to CTA to give a total DP of 250-500 (n).

#### Triblock homopolymer synthesis

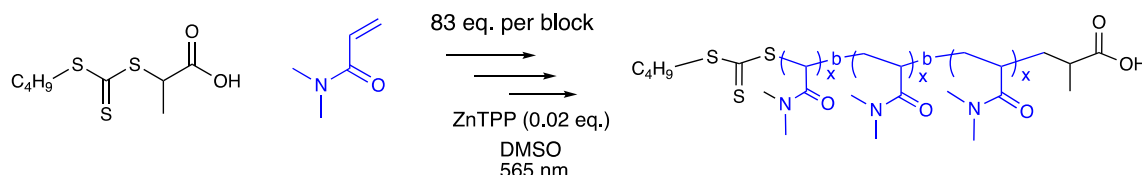

#### Triblock peptide copolymer synthesis

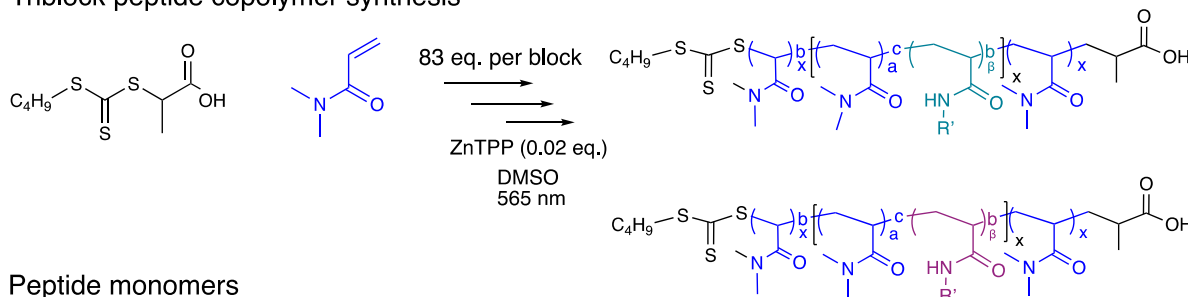

#### Peptide monomers

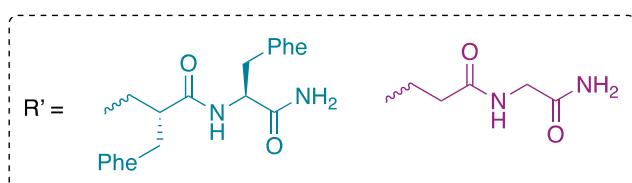

**Scheme S2.** General PET-RAFT polymerisation of triblock polymers with DMA, FF, GG<sup>O</sup>, and GG<sup>N</sup> monomers. Mol.% of peptide ( $\beta$ ) in the central block was kept constant at 10% and mol.% of DMA (a) kept to 90% relative to CTA. Each block (x) was DP83 to give a total of DP250.

**Table S1.** Example experimental conditions for the synthesis of triblock polymers of DP250 with either DMA, FF, and GG<sup>O</sup> peptide monomers with a sampling volume of 30  $\mu$ L after each extension, from a macroRAFT agent.

|                                            | Block numbers |              |              |
|--------------------------------------------|---------------|--------------|--------------|
|                                            | #1            | #2           | #3           |
| DP to add to total                         | 83            | 83           | 83           |
| [Monomer stock] (M)                        | 2             | 2            | 2            |
| <b>Monomer to add (<math>\mu</math>L)</b>  | <b>90</b>     | <b>74.7</b>  | <b>64.6</b>  |
| [Monomer] (M)                              | 1.00          | 0.83         | 0.45         |
| [MacroRAFT] (M)                            | 0.012         | 0.008        | 0.006        |
| [ZnTPP] ( $\times 10^{-4}$ M)              | 1.2           | 0.8          | 0.5          |
| <b>Total volume (<math>\mu</math>L)</b>    | <b>180</b>    | <b>224.7</b> | <b>259.3</b> |
| <b>Sampling volume (<math>\mu</math>L)</b> | <b>30</b>     | <b>30</b>    | <b>30</b>    |
| New volume [a]                             | 150           | 194.7        | 229.3        |
| <b>ZnTPP: RAFT (%)</b>                     | <b>1.00</b>   | <b>1.00</b>  | <b>0.83</b>  |

Notes: [a] New volume is the volume after sampling and before the next monomer addition

Hexablock homopolymer synthesis

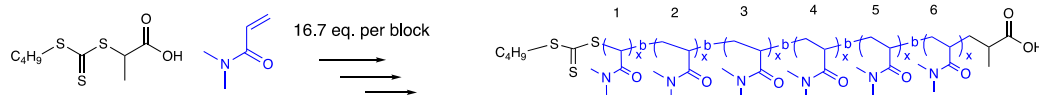

Hexablock peptide copolymer synthesis

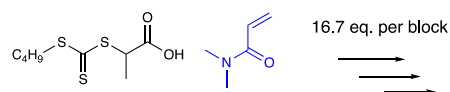

Peptide monomers

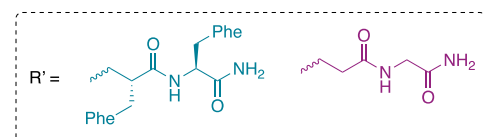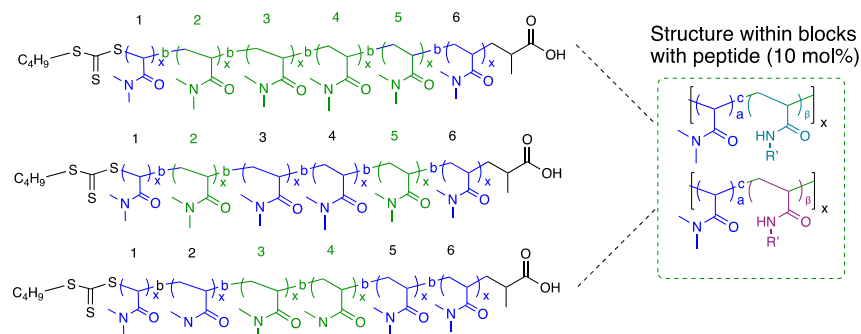

**Scheme S3.** Structure of the hexablock polymers generated through automation using liquid handling robot with DMA, FF, GG<sup>O</sup>, and GG<sup>N</sup> monomers. Mol.% of peptide ( $\beta$ ) kept constant at 10% and mol.% of DMA (a) kept to 90% relative to CTA. Each block (x) was DP16.7 to give a total of DP100.

**Table S2.** Example experimental conditions for the automated synthesis of DP100 hexablock polymers with either DMA, FF, and GG<sup>0</sup> peptide monomers with a sampling volume of 30 uL after each extension, from a macroRAFT agent.

|                                 | Block numbers |              |              |              |              |              |
|---------------------------------|---------------|--------------|--------------|--------------|--------------|--------------|
|                                 | #1            | #2           | #3           | #4           | #5           | #6           |
| DP to add total                 | 16.7          | 16.7         | 16.7         | 16.7         | 16.7         | 16.7         |
| [Monomer stock] (M)             | 2             | 2            | 2            | 2            | 2            | 2            |
| <b>Monomer to add (uL)</b>      | <b>37.5</b>   | <b>52.5</b>  | <b>39.6</b>  | <b>30.6</b>  | <b>23.7</b>  | <b>18.1</b>  |
| [Monomer] (M)                   | 0.75          | 0.423        | 0.300        | 0.231        | 0.188        | 0.158        |
| [MacroRAFT] (M)                 | 0.045         | 0.026        | 0.018        | 0.014        | 0.011        | 0.009        |
| [ZnhTPP] (x 10 <sup>-4</sup> M) | 4.5           | 3.4          | 2.9          | 2.7          | 2.5          | 2.5          |
| <b>Total volume (uL)</b>        | <b>100</b>    | <b>122.5</b> | <b>132.1</b> | <b>132.8</b> | <b>126.5</b> | <b>114.6</b> |
| <b>Sampling volume (uL)</b>     | <b>30</b>     | <b>30</b>    | <b>30</b>    | <b>30</b>    | <b>30</b>    | <b>30</b>    |
| New volume <sup>[a]</sup>       | 70            | 92.5         | 102.1        | 102.8        | 96.5         | 84.6         |
| ZnhTPP: RAFT (%)                | 1.00          | 1.32         | 1.63         | 1.95         | 2.27         | 2.59         |

Notes: [a] New volume is the volume after sampling and before the next monomer addition

## 2. CHARACTERISATION DATA

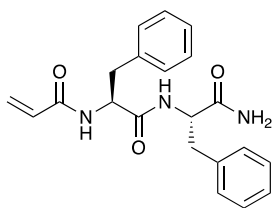

**LFF-acrylamide:**  $^1\text{H-NMR}$  (400 MHz,  $d_6$ -DMSO):  $\delta$  8.30 (d, 1H, NH,  $J = 8.0$  Hz), 8.07 (d, 1H, NH,  $J = 8.0$  Hz), 7.31 (s, 1H, NH<sub>2</sub>), 7.05 – 7.25 (10H, ArH), 6.20 (q, 1H, CH<sub>2</sub>CHO-,  $J = 8.4$  Hz), 6.00 (dd, 1H, CH<sub>2</sub>CHO-,  $J = 16$  Hz), 5.55 (dd, 1H, CH<sub>2</sub>CHO-,  $J = 8$  Hz), 4.58 (m, 1H, C $\alpha$ -H,  $J = 12$  Hz), 4.4 (m, 1H, C $\alpha$ -H,  $J = 8$  Hz), 2.8 (m, 2H, CH<sub>2</sub>,  $J = 16$  Hz), 2.7 (m, 2H, CH<sub>2</sub>,  $J = 12$  Hz).  $^{13}\text{C-NMR}$  (125 MHz,  $d_6$ -DMSO): 40.9, 54.6, 72.9, 126.9, 128.5, 129.7, 138.6, 162.2, 165.3, 171.7. ESI-MS:  $[\text{M} + \text{H}]$  calculated: 366.17, found: 366.2.

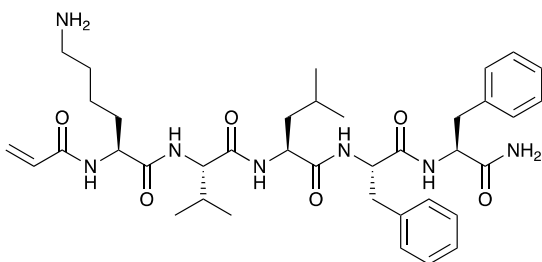

**LKVLFF-acrylamide:**  $^1\text{H-NMR}$  (400 MHz,  $d_6$  - DMSO):  $\delta$  8.30 (d, 1H, NH,  $J = 8$  Hz), 8.04 (d, 1H, NH,  $J = 8$  Hz), 7.97 (d, 1H, NH,  $J = 8$  Hz), 7.87 (d, 1H, NH,  $J = 4.8$  Hz), 7.82 (d, 1H, NH<sub>2</sub>,  $J = 8$  Hz), 7.69 (d, 1H, NH,  $J = 8$  Hz), 7.1 – 7.3 (m, 10H, ArH), 6.34 (q, 1H, CH<sub>2</sub>CHO-,  $J = 6.8$  Hz), 6.1 (dd, 1H, CH<sub>2</sub>CHO-,  $J = 16$  Hz), 5.61 (dd, 1H, CH<sub>2</sub>CHO-,  $J = 8.8$  Hz), 4 - 4.5 (m, 5H, C $\alpha$ -H), 2.6 – 3.1 (m, 12, CH<sub>2</sub> (Phe), CH<sub>2</sub> (Lys)), 1.9 (m, 2H, CH<sub>2</sub> (Val)), 1.5 (m, 6H, CH<sub>3</sub> (Leu)), 1.3 (m, 6H, CH<sub>3</sub> (Val)). ESI-MS:  $[\text{M} + \text{H}]$  calculated: 706.89, found: 706.35.

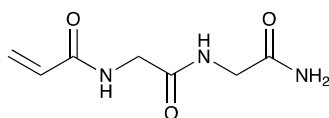

**GG-acrylamide:**  $^1\text{H-NMR}$  (400 MHz,  $d_6$ -DMSO):  $\delta$  8.41 (d, 1H, NH,  $J = 8.8$  Hz), 8.13 (d, 1H, NH,  $J = 8.8$  Hz), 7.24 (s, 1H, NH<sub>2</sub>), 6.38 (dd, 1H, CH<sub>2</sub>CHO-,  $J = 9.6$  Hz), 6.10 (dd, 1H, CH<sub>2</sub>CHO,  $J = 16.4$  Hz-), 5.62 (dd, 1H, CH<sub>2</sub>CHO-,  $J = 9.6$  Hz), 3.81 (d, 2H, C $\alpha$ -H,  $J = 2.4$  Hz), 3.62 (d, 2H, C $\alpha$ -H,  $J = 6$  Hz).  $^{13}\text{C-NMR}$  (125 MHz,  $d_6$ -DMSO):  $\delta$  42.3, 42.7, 125.8, 132.4, 166.4, 169.4, 171.9.

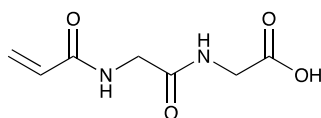

**GG-carboxylic acid:** Gly-Gly-OH (2 g, 15.2 mmol) was dissolved in methanol (15 mL), with potassium hydroxide (1.7g, 30.3 mmol), sodium carbonate (0.48 g, 4.5 mmol) and magnesium sulphate (3.82 g, 31.8 mmol), with and stirred. The solution was cooled to 0 °C in an ice bath, and acryloyl chloride (1.35 mL, 1.51 g, 16.7 mmol) was added dropwise. The mixture was left to react for 3h while warming to room temperature, after which it was heated to 50°C and filtered to remove the salts. The filtrate was concentrated to ~20mL and triturated from isopropyl alcohol to yield product as a white solid (2.16 g, 77%).  $^1\text{H-NMR}$  (400 MHz,  $d_6$ -DMSO):  $\delta$  13.03 (s, 1H, OH), 8.41 (d, 1H, NH,  $J = 8$  Hz), 8.14 (d, 1H, NH,  $J = 8$  Hz), 6.48 (q, 1H, CH<sub>2</sub>CHO-), 6.09 (dd, 1H, CH<sub>2</sub>CHO-), 5.74 (dd, 1H, CH<sub>2</sub>CHO), 3.81 (d, 2H, C $\alpha$  -H), 3.49 (d, 2H, C $\alpha$  -H).  $^{13}\text{C-NMR}$  (125 MHz,  $d_6$ -DMSO):  $\delta$  42.6, 43.7, 126.8, 132.1, 165.8, 169.3, 174.0.

**Table S3.** Summary of the reaction conditions, conversion and molecular weight of homopolymers synthesised with DMA, KVLFF, FF, GG<sup>N</sup>, and GG<sup>O</sup> peptide monomers on DMF GPC with 2.5 g/L of LiBr and 0.1 g/L of BHT. [a] Description of the homopolymers with the grafting density of peptide and target DP. [b] Conversion (%) calculated using <sup>1</sup>H-NMR. [c] *M<sub>w</sub>* calculated relative to linear PMMA standards without correction.

| #   | Name <sup>[a]</sup>                   | [CTA]/[Monomer]/[ZnTPP] | Time (h) | X % <sup>[b]</sup> | <i>M<sub>n</sub></i> Theo | <i>M<sub>n</sub></i> DMF GPC <sup>[c]</sup> | <i>Đ</i> DMF GPC | <i>M<sub>n</sub></i> Aq. GPC <sup>[d]</sup> | <i>Đ</i> Aq. GPC |
|-----|---------------------------------------|-------------------------|----------|--------------------|---------------------------|---------------------------------------------|------------------|---------------------------------------------|------------------|
| P1  | (D) <sub>500</sub>                    | 1:500: 0.02             | 1.5      | 98                 | 48812                     | 31685                                       | 1.22             | 41624                                       | 1.59             |
| P2  | (G <sup>N</sup> ) <sub>5%, 500</sub>  | 1:500: 0.02             | 2.5      | 95                 | 52955                     | 24312                                       | 1.2              | 48822                                       | 1.16             |
| P3  | (G <sup>O</sup> ) <sub>5%, 500</sub>  | 1:500: 0.02             | 2.5      | 93                 | 43980                     | -                                           | -                | -                                           | -                |
| P4  | (G <sup>N</sup> ) <sub>10%, 500</sub> | 1:500: 0.02             | 2.5      | 95                 | 51814                     | 43933                                       | 1.27             | 60763                                       | 1.17             |
| P5  | (G <sup>O</sup> ) <sub>10%, 500</sub> | 1:500: 0.02             | 2.5      | 92                 | 45785                     | -                                           | -                | -                                           | -                |
| P6  | (G <sup>N</sup> ) <sub>15%, 500</sub> | 1:500: 0.02             | 2.5      | 94                 | 49100                     | 14518                                       | 1.08             | 16443                                       | 1.31             |
| P7  | (G <sup>O</sup> ) <sub>15%, 500</sub> | 1:500: 0.02             | 2.5      | 95                 | 49620                     | -                                           | -                | -                                           | -                |
| P8  | (F) <sub>5%, 500</sub>                | 1:500: 0.02             | 2.5      | 95                 | 54600                     | 23698                                       | 1.11             | 42402                                       | 1.15             |
| P9  | (F) <sub>10%, 500</sub>               | 1:500: 0.02             | 2.5      | 93                 | 59647                     | 29965                                       | 1.12             | 63013                                       | 1.19             |
| P10 | (F) <sub>15%, 500</sub>               | 1:500: 0.02             | 2.5      | 93                 | 61161                     | 18661                                       | 1.18             | 9082                                        | 1.41             |
| P11 | (K) <sub>5%, 500</sub>                | 1:500: 0.02             | 2.5      | 92                 | 60714                     | 32634                                       | 1.17             | -                                           | -                |
| P12 | (K) <sub>10%, 500</sub>               | 1:500: 0.02             | 3        | 90                 | 73052                     | 27913                                       | 1.13             | -                                           | -                |
| P13 | (K) <sub>15%, 500</sub>               | 1:500: 0.02             | 3        | 91                 | 83088                     | 14472                                       | 1.25             | -                                           | -                |
| P14 | (D) <sub>250</sub>                    | 1:250: 0.02             | 3        | 95                 | 20929                     | 23854                                       | 1.24             | 16546                                       | 1.15             |
| P15 | (G <sup>N</sup> ) <sub>5%, 250</sub>  | 1:250: 0.02             | 3        | 95                 | 22581                     | 18145                                       | 1.27             | 60922                                       | 1.27             |
| P16 | (F) <sub>5%, 250</sub>                | 1:250: 0.02             | 3        | 93                 | 20959                     | 20668                                       | 1.2              | 46083                                       | 1.16             |
| P18 | (G <sup>N</sup> ) <sub>10%, 250</sub> | 1:250: 0.02             | 3        | 92                 | 27452                     | -                                           | -                | -                                           | -                |
| P19 | (F) <sub>10%, 250</sub>               | 1:250: 0.02             | 3        | 97                 | 28623                     | 41031                                       | 1.38             | 35544                                       | 1.3              |
| P20 | (K) <sub>10%, 250</sub>               | 1:250: 0.02             | 3        | 92                 | 35368                     | 39382                                       | 1.28             | 29769                                       | 1.21             |
| P21 | (G <sup>N</sup> ) <sub>15%, 250</sub> | 1:250: 0.02             | 3        | 93                 | 42118                     | 33116                                       | 1.29             | -                                           | -                |
| P22 | (F) <sub>15%, 250</sub>               | 1:250: 0.02             | 3        | 94                 | 31027                     | 14968                                       | 1.03             | 20047                                       | 1.26             |
| P23 | (K) <sub>15%, 250</sub>               | 1:250: 0.02             | 3        | 91                 | 41663                     | 14833                                       | 1.02             | 15937                                       | 1.35             |

**Table S4.** Summary of triblock polymers synthesised with DMA, FF, and GG<sup>0</sup> peptide monomers on DMF GPC with 2.5 g/L of LiBr and 0.1 g/L of BHT. [a] Description of the multiblock polymers with the position of peptide monomer and the target DP. [b] Mw and dispersity calculated relative to linear PMMA standards without correction.

| #   | Block | Time (h) | X (%) <sup>[a]</sup> | <i>M<sub>n</sub></i> (Theo) | <i>M<sub>n</sub></i> (GPC) <sup>[b]</sup> | <i>Đ</i> |
|-----|-------|----------|----------------------|-----------------------------|-------------------------------------------|----------|
| P24 | #1    | 24       | 89                   | 7469                        | 5132                                      | 1.09     |
| P25 |       | 24       | 91                   | 7469                        | 6871                                      | 1.1      |
| P26 |       | 24       | 98                   | 7469                        | 7341                                      | 1.11     |
| P24 | #2    | 15       | 90                   | 14700                       | 10176                                     | 1.15     |
| P25 |       | 15       | 92                   | 17176                       | 12483                                     | 1.09     |
| P26 |       | 15       | 93                   | 21682                       | 16083                                     | 1.26     |
| P24 | #3    | 15       | 91                   | 20929                       | 25398                                     | 1.29     |
| P25 |       | 15       | 90                   | 24407                       | 17706                                     | 1.18     |
| P26 |       | 15       | 95                   | 28623                       | 27832                                     | 1.2      |

**Table S5.** Summary of hexablock polymers synthesised with DMA, FF and GG<sup>0</sup> peptide monomers on DMF GPC with 2.5 g/L of LiBr and 0.1 g/L of BHT. [a] Mw and dispersity calculated relative to linear PMMA standards without correction.

| #   | Name                                                                                 | <i>M<sub>n</sub></i> (Theo) | <i>M<sub>n</sub></i> (GPC) <sup>[a]</sup> | <i>Đ</i> |
|-----|--------------------------------------------------------------------------------------|-----------------------------|-------------------------------------------|----------|
| P27 | (D-D-D-D-D-D) <sub>100</sub>                                                         | 8968                        | 6245                                      | 1.14     |
| P28 | (D-G <sup>0</sup> -D-D-G <sup>0</sup> -D) <sub>100</sub>                             | 9645                        | 4986                                      | 1.07     |
| P29 | (D-D-G <sup>0</sup> -G <sup>0</sup> -D-D) <sub>100</sub>                             | 9645                        | 5271                                      | 1.10     |
| P30 | (D-G <sup>0</sup> -G <sup>0</sup> -G <sup>0</sup> -G <sup>0</sup> -D) <sub>100</sub> | 9645                        | 5843                                      | 1.14     |
| P31 | (D-F-D-D-F-D) <sub>100</sub>                                                         | 11358                       | 5372                                      | 1.07     |
| P32 | (D-D-F-F-D-D) <sub>100</sub>                                                         | 11358                       | 4516                                      | 1.05     |
| P33 | (D-F-F-F-F-D) <sub>100</sub>                                                         | 11358                       | 5360                                      | 1.08     |

### 3. SUPPLEMENTARY FIGURES

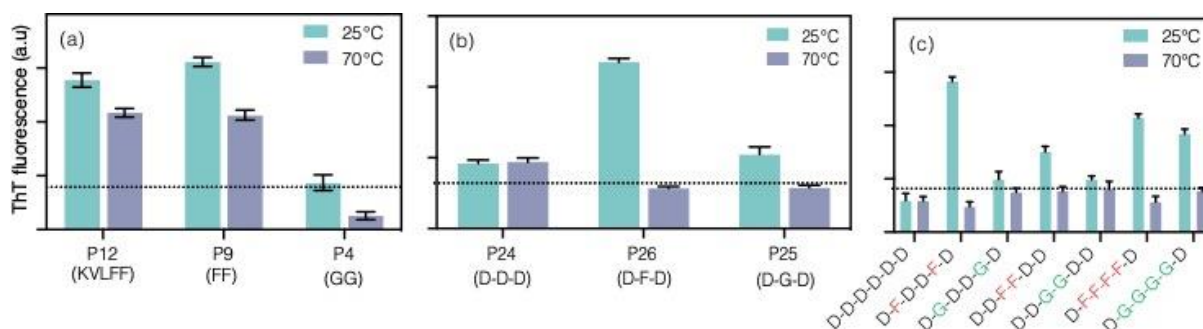

**Figure S1.** a) Comparison of fluorescence intensity of ThT in homoblock copolymers of either FF, KVLFF, and GGN peptide monomers (DP = 500) in water at 1 mg/mL at 25°C and when heated to 70°C. b) Comparison of fluorescence intensity of ThT in triblock polymers of either DMA, FF, and GGO peptide monomers (DP = 250) in water at 1 mg/mL at 25°C and when heated to 70°C. c) Comparison of fluorescence intensity of ThT in hexablock polymers of either DMA, FF, and GGO peptide monomers (DP = 100) in water at 1 mg/mL at 25°C and when heated to 70°C.

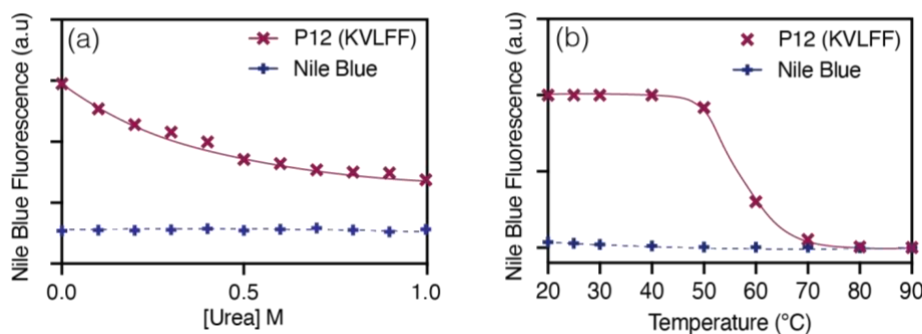

**Figure S2.** Nile blue fluorescence showing the disassembly of KVLFF copolymer at 10% peptide loading (P12) with a) increasing urea concentration and b) with increasing temperature. The intensity of the Nile blue blank (0.5  $\mu$ M) is indicated by blue line in each case.

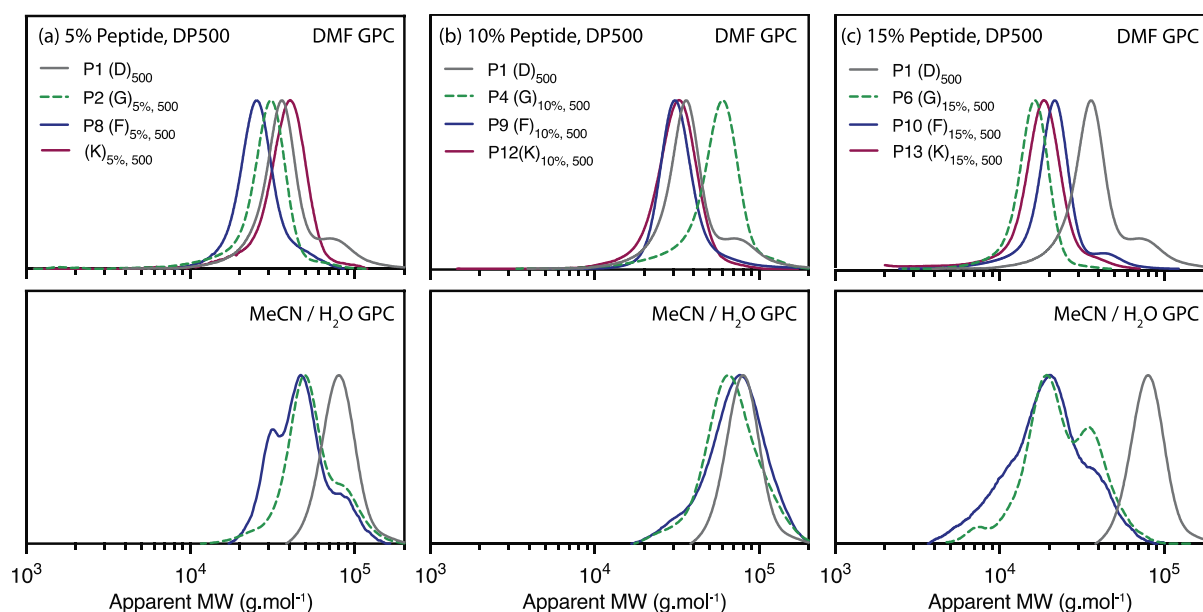

**Figure S3.** DMF and 40% (vol) MeCN / H<sub>2</sub>O GPC traces of KVLFF, FF, and GG copolymers with DMA at DP500 with a peptide density of a) 5%, b) 10%, and c) 15%. Molecular weights are calculated relative to PMMA standards (DMF GPC) and PEO standards (for the MeCN / H<sub>2</sub>O GPC) without correction.

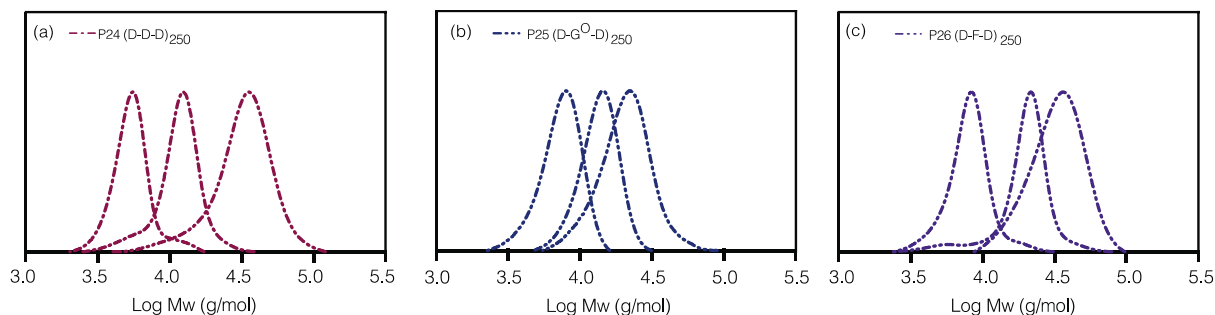

**Figure S4.** DMF traces of the block extensions of triblock polymers. (a) Block extensions of triblock polymers with DMA at DP250 (b) Block extensions of triblock polymers with GG<sup>O</sup> monomer positioned in middle block with 10 mol.% peptide at DP250 (c) Block extensions of triblock polymers with FF monomer positioned in middle block with 10 mol.% peptide at DP250.

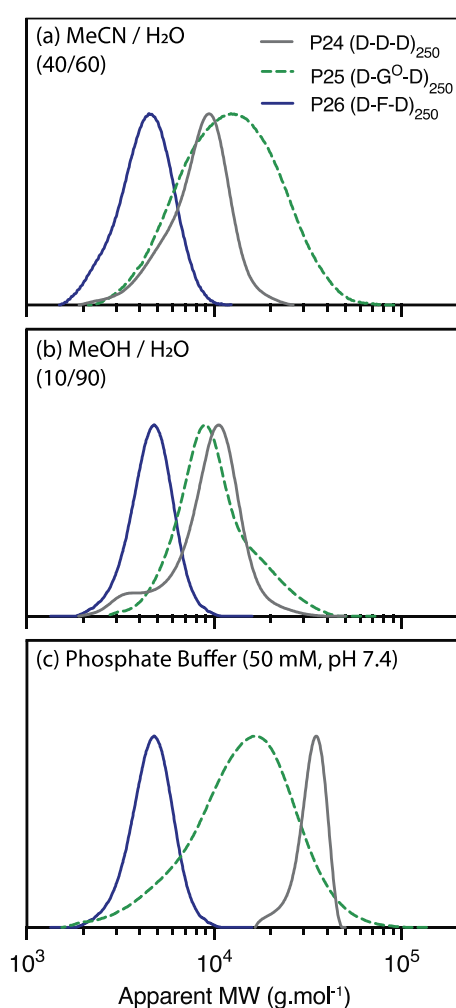

**Figure S5.** GPC traces of the DMA, FF, and GG<sup>O</sup> triblock polymers at DP250 using an eluent of a) 40% MeCN / H<sub>2</sub>O, b) 10% MeOH / H<sub>2</sub>O or c) phosphate buffer. Molecular weights are calculated relative to PEO standards without correction in all cases.

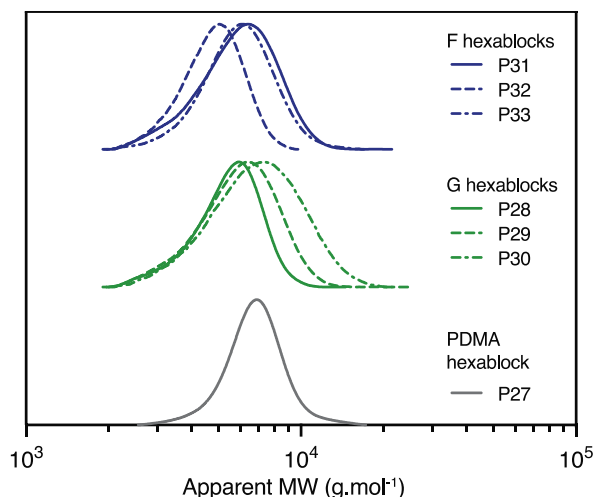

**Figure S6.** DMF GPC traces of the DMA, FF, and GG<sup>O</sup> hexablock polymers at a total DP of 100 (16.7 per block). Molecular weights are calculated relative to PEO standards without correction in all cases.

**Table S6.** Diffusion constants (*D*) and associated errors, and corresponding hydrodynamic radii (*r<sub>h</sub>*) and associated errors calculated from the DOSY-NMR experiments in 10% MeOD/D<sub>2</sub>O (v/v) for peptide copolymers. [a] Description of the multiblock polymer structure with the position of peptide monomer and target DP.

| #   | Description <sup>[a]</sup>             | <i>D</i> (cm <sup>2</sup> .s <sup>-1</sup> ) | <i>D</i> <sub>err</sub> | <i>r<sub>h</sub></i> (nm) <sup>[b]</sup> | <i>r</i> <sub>err</sub> |
|-----|----------------------------------------|----------------------------------------------|-------------------------|------------------------------------------|-------------------------|
| P8  | (F) <sub>5%</sub> , 500                | 3.7 x 10 <sup>-7</sup>                       | 3.1 x 10 <sup>-9</sup>  | 5.30                                     | 0.04                    |
| P9  | (F) <sub>10%</sub> , 500               | 2.7 x 10 <sup>-7</sup>                       | 1.5 x 10 <sup>-8</sup>  | 7.30                                     | 0.40                    |
| P10 | (F) <sub>15%</sub> , 500               | 4.2 x 10 <sup>-7</sup>                       | 7.0 x 10 <sup>-9</sup>  | 4.60                                     | 0.07                    |
| P2  | (G <sup>N</sup> ) <sub>5%</sub> , 500  | 3.5 x 10 <sup>-7</sup>                       | 2.6 x 10 <sup>-8</sup>  | 5.60                                     | 0.41                    |
| P4  | (G <sup>N</sup> ) <sub>10%</sub> , 500 | 3.1 x 10 <sup>-7</sup>                       | 5.2 x 10 <sup>-10</sup> | 6.40                                     | 0.01                    |
| P6  | (G <sup>N</sup> ) <sub>15%</sub> , 500 | 3.9 x 10 <sup>-7</sup>                       | 3.4 x 10 <sup>-9</sup>  | 5.00                                     | 0.04                    |
| P14 | (D) <sub>250</sub>                     | 4.1 x 10 <sup>-7</sup>                       | 5.6 x 10 <sup>-9</sup>  | 5.00                                     | 0.07                    |
| P16 | (F) <sub>5%</sub> , 250                | 4.1 x 10 <sup>-7</sup>                       | 6.5 x 10 <sup>-9</sup>  | 4.80                                     | 0.07                    |
| P19 | (F) <sub>10%</sub> , 250               | 5.4 x 10 <sup>-7</sup>                       | 4.9 x 10 <sup>-9</sup>  | 3.60                                     | 0.03                    |
| P22 | (F) <sub>15%</sub> , 250               | 3.4 x 10 <sup>-7</sup>                       | 2.4 x 10 <sup>-8</sup>  | 3.80                                     | 0.38                    |
| P15 | (G <sup>N</sup> ) <sub>5%</sub> , 250  | 3.3 x 10 <sup>-7</sup>                       | 3.2 x 10 <sup>-9</sup>  | 4.10                                     | 0.04                    |
| P18 | (G <sup>N</sup> ) <sub>10%</sub> , 250 | 2.6 x 10 <sup>-7</sup>                       | 1.1 x 10 <sup>-9</sup>  | 4.50                                     | 0.02                    |
| P21 | (G <sup>N</sup> ) <sub>15%</sub> , 250 | 5.7 x 10 <sup>-7</sup>                       | 4.4 x 10 <sup>-8</sup>  | 3.60                                     | 0.27                    |

**Table S7.** Diffusion constants (*D*) and associated errors, and corresponding hydrodynamic radii (*r<sub>h</sub>*) and associated errors calculated from the DOSY-NMR experiments in 10% MeOD/D<sub>2</sub>O (v/v) for multiblock polymers. [a] Description of the multiblock polymer structure with the position of peptide monomer and target DP.

| Polymer | Description <sup>[a]</sup>           | <i>D</i> (cm <sup>2</sup> .s <sup>-1</sup> ) | <i>D</i> <sub>err</sub> | <i>r<sub>h</sub></i> (nm) | <i>r</i> <sub>err</sub> |
|---------|--------------------------------------|----------------------------------------------|-------------------------|---------------------------|-------------------------|
| P24     | (D-D-D) <sub>250</sub>               | 6.8 x 10 <sup>-7</sup>                       | 5.9 x 10 <sup>-9</sup>  | 3.00                      | 0.03                    |
| P26     | (D-F-D) <sub>250</sub>               | 1.7 x 10 <sup>-6</sup>                       | 1.2 x 10 <sup>-8</sup>  | 1.20                      | 0.01                    |
| P25     | (D-G <sup>O</sup> -D) <sub>250</sub> | 5.7 x 10 <sup>-7</sup>                       | 3.5 x 10 <sup>-9</sup>  | 3.50                      | 0.02                    |
| P27     | (D-D-D-D-D) <sub>100</sub>           | 1.0 x 10 <sup>-6</sup>                       | 1.0 x 10 <sup>-8</sup>  | 2.00                      | 0.02                    |
| P31     | (D-F-D-D-F-D) <sub>100</sub>         | 1.9 x 10 <sup>-6</sup>                       | 6.5 x 10 <sup>-8</sup>  | 1.00                      | 0.03                    |
| P28     | (D-G-D-D-G-D) <sub>100</sub>         | 8.7 x 10 <sup>-7</sup>                       | 7.2 x 10 <sup>-9</sup>  | 2.30                      | 0.01                    |
| P32     | (D-D-F-F-D-D) <sub>100</sub>         | 1.1 x 10 <sup>-6</sup>                       | 1.9 x 10 <sup>-8</sup>  | 1.90                      | 0.03                    |
| P29     | (D-D-G-G-D-D) <sub>100</sub>         | 8.6 x 10 <sup>-7</sup>                       | 5.0 x 10 <sup>-9</sup>  | 2.40                      | 0.01                    |
| P33     | (D-F-F-F-F-D) <sub>100</sub>         | 1.0 x 10 <sup>-6</sup>                       | 5.8 x 10 <sup>-9</sup>  | 2.00                      | 0.01                    |
| P30     | (D-G-G-G-G-D) <sub>100</sub>         | 8.3 x 10 <sup>-7</sup>                       | 4.9 x 10 <sup>-9</sup>  | 2.50                      | 0.01                    |

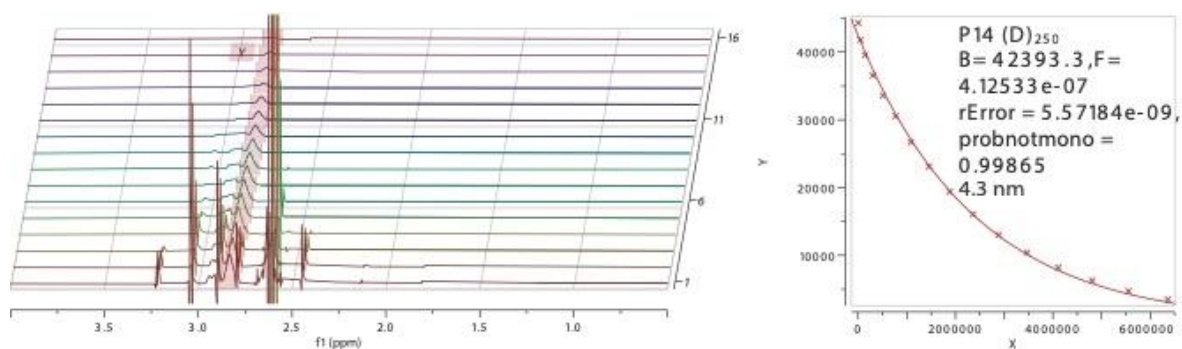

**Figure S7.** DOSY-NMR data for P14

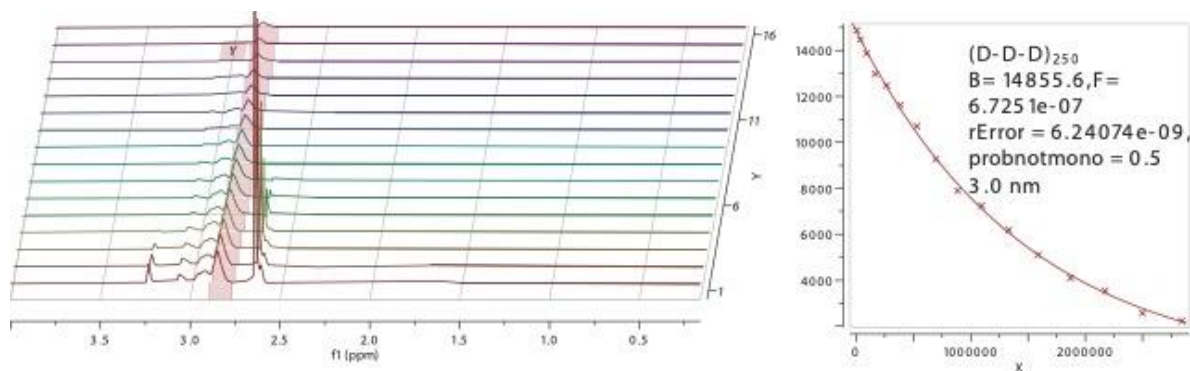

**Figure S8.** DOSY-NMR data for P24

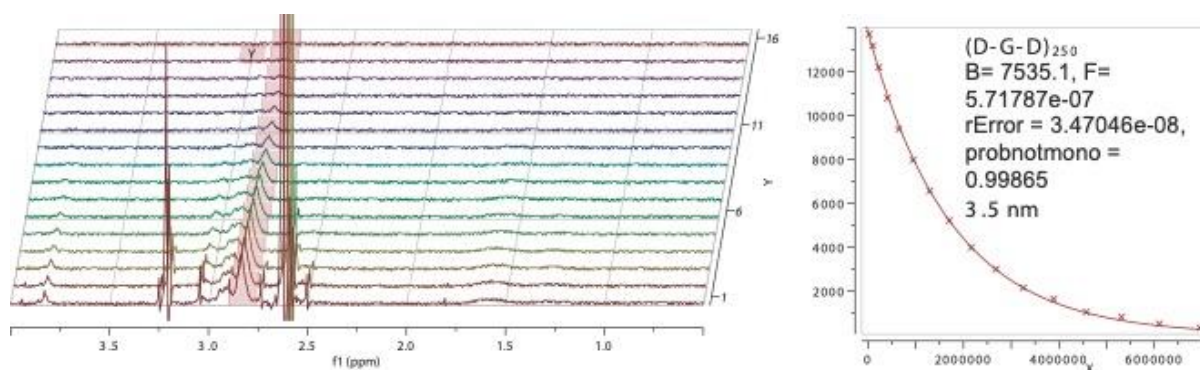

**Figure S9.** DOSY-NMR data for P25

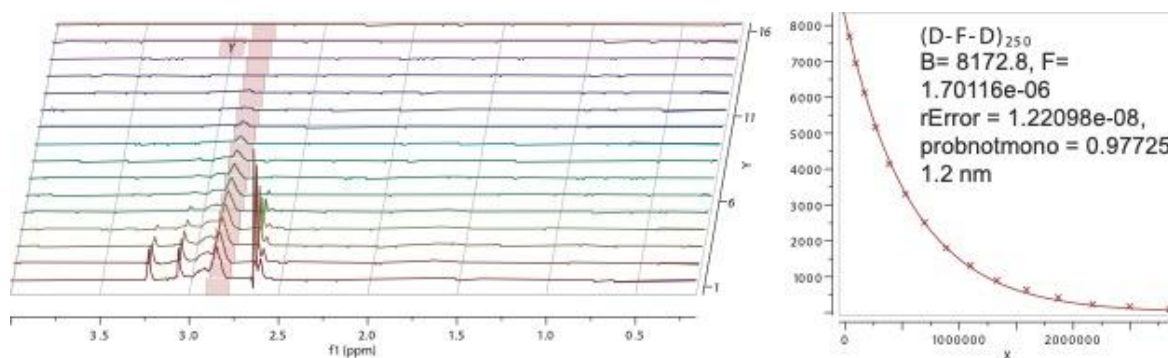

**Figure S10.** DOSY-NMR data for P26

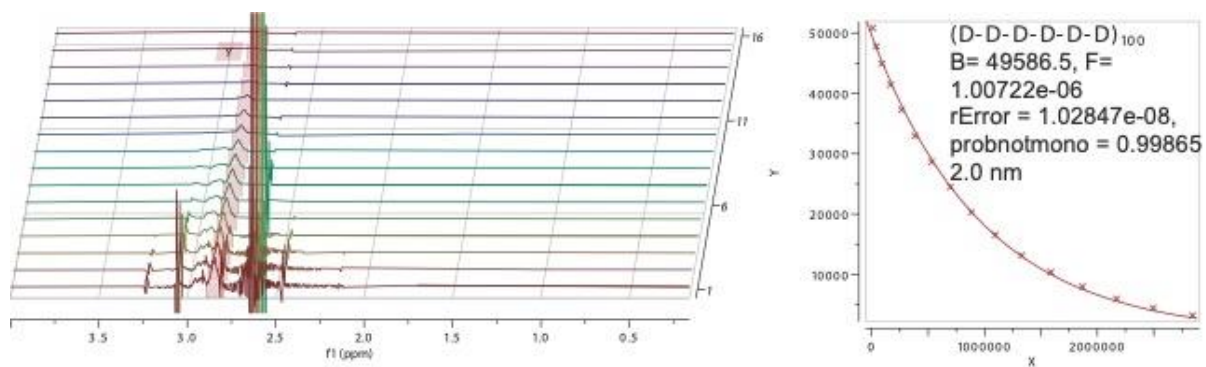

**Figure S11.** DOSY-NMR data for P27

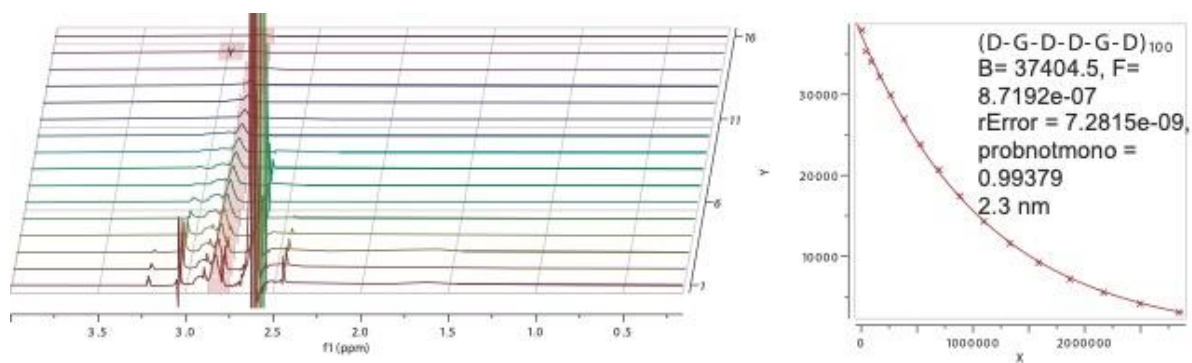

**Figure S12.** DOSY-NMR data for P28

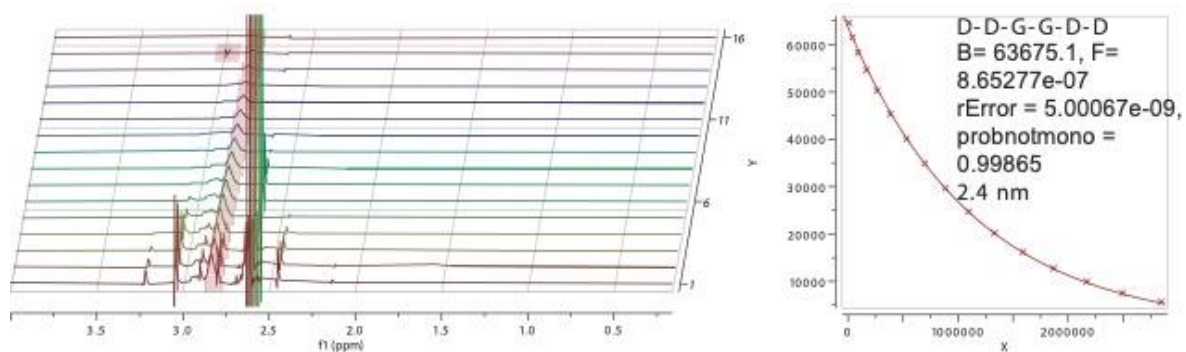

**Figure S13.** DOSY-NMR data for P29

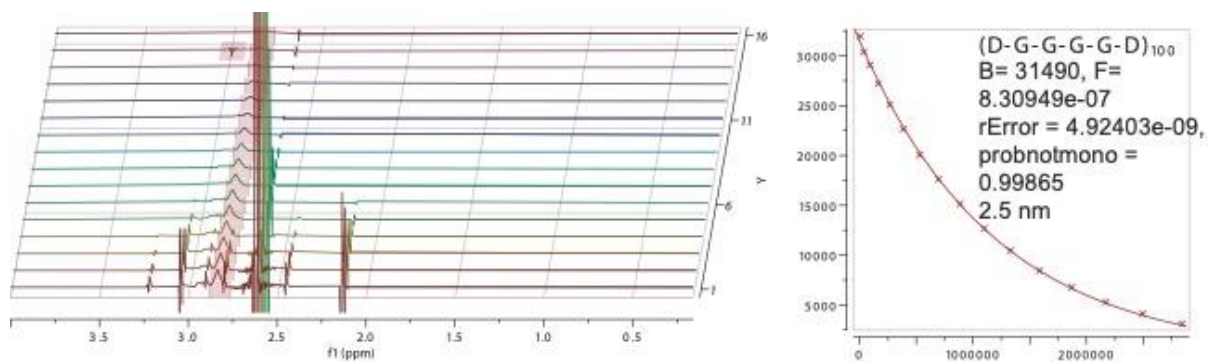

**Figure S14.** DOSY-NMR data for P30

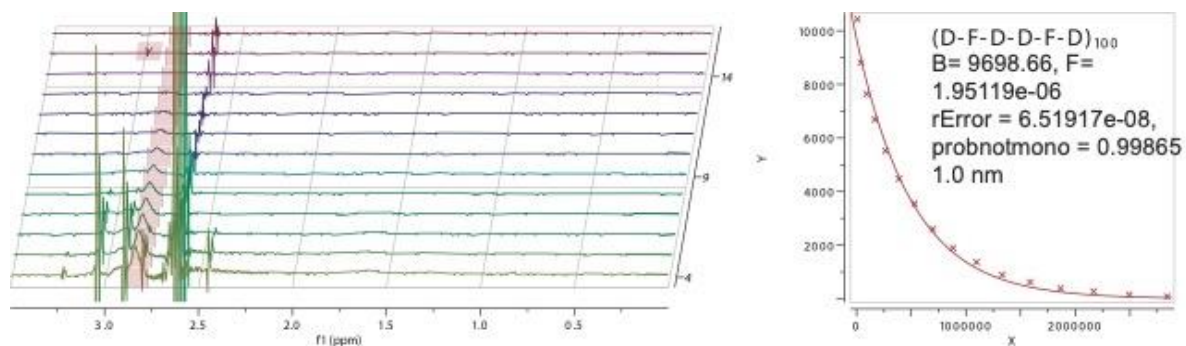

**Figure S15.** DOSY-NMR data for P31

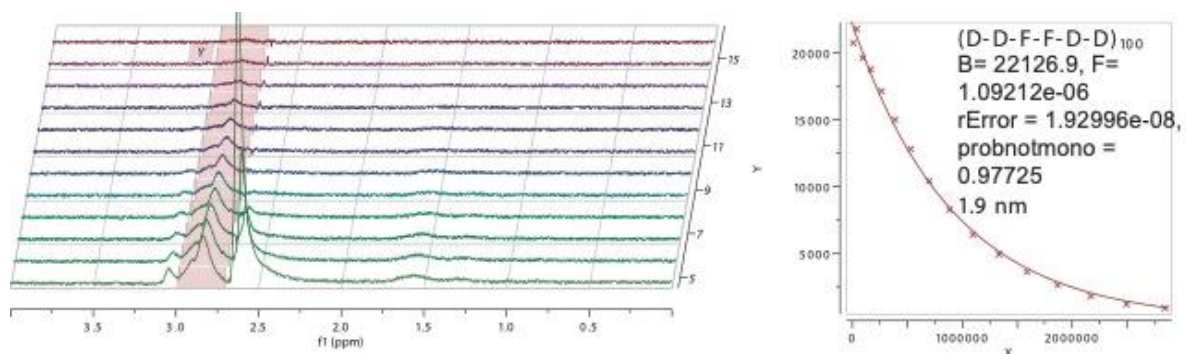

**Figure S16.** DOSY-NMR data for P32

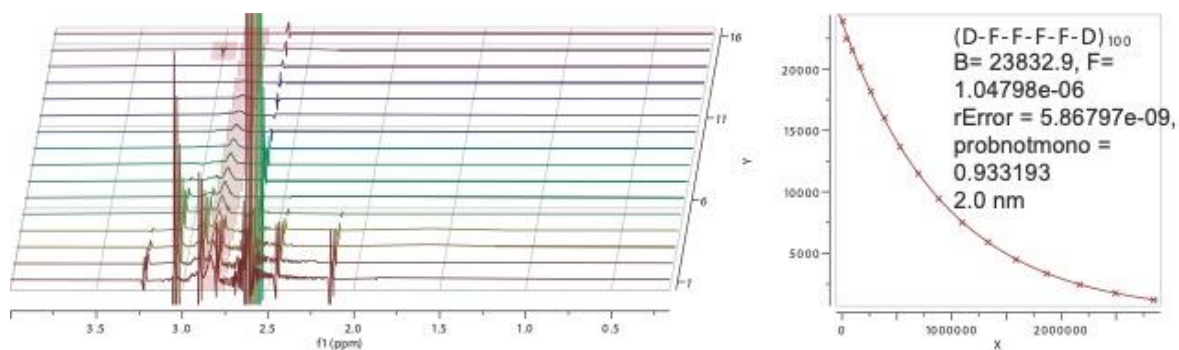

**Figure S17.** DOSY-NMR data for P33
